# Supplementary material for: Dietary flavonoid intake is negatively associated with accelerating aging: an American population-based cross-sectional study
Source: Research Square preprint supplement (doi:10.21203/rs.3.rs-4790160/v1), 2024-08-27
Supplement: Supplementary file 1 [file 26ccfa914a63ffb50da0d2d8.docx]

Supplementary Table 1

The association between flavan-3-ols intake and PhenoAgeAccel in different subgroups.

| **Characteristic** | Flavan-3-ols **(mg/day)**  **β (95% CI)** | | | | | ***P* for trend** | ***P* for interaction** |
| --- | --- | --- | --- | --- | --- | --- | --- |
| **Q 1** | **Q 2** | **Q 3** | **Q 4** | **Q 5** |  |  |
| **Drink** |  |  |  |  |  |  | 0.058 |
| No | Reference | -0.86 (-1.67, -0.05) | -0.77 (-1.74, 0.21) | 1.02 (-0.08, 2.13) | -0.92 (-1.75, -0.10) | 0.87 |  |
| Yes | Reference | -1.03 (-2.24, 0.18) | -1.39 (-2.58, -0.20) | -1.23 (-2.47, 0.00) | -0.55 (-2.08, 0.98) | 0.49 |  |
| **Smoke** |  |  |  |  |  |  | 0.515 |
| No | Reference | -1.43 (-2.54, -0.32) | -1.28 (-2.36, -0.19) | -0.43 (-1.59, 0.73) | -1.30 (-2.35, -0.25) | 0.20 |  |
| Yes | Reference | -0.38 (-1.36, 0.61) | -0.80 (-1.87, 0.26) | 0.68 (-0.38, 1.74) | -0.28 (-1.19, 0.64) | 0.81 |  |
| **Body mass index** |  |  |  |  |  |  | 0.476 |
| <25 | Reference | -1.97 (-3.34, -0.61) | -2.47 (-3.74, -1.19) | -1.05 (-2.38, 0.29) | -1.78 (-3.37, -0.19) | 0.25 |  |
| 25-30 | Reference | -0.52 (-1.63, 0.60) | -0.44 (-1.57, 0.68) | 0.02 (-1.13, 1.18) | -0.19 (-1.08, 0.69) | 0.83 |  |
| >30 | Reference | -0.72 (-1.70, 0.26) | -0.74 (-2.20, 0.71) | 0.82 (-0.85, 2.49) | -0.97 (-1.98, 0.04) | 0.54 |  |
| **Physical activity** |  |  |  |  |  |  | 0.661 |
| Inactive | Reference | -1.02 (-2.15, 0.11) | 1.35 (-2.40, -0.30) | -0.63 (-2.45, 1.20) | -1.00 (-2.15, 0.15) | 0.30 |  |
| Insufficient | Reference | -1.42 (-2.88, 0.04) | -1.03 (-2.99, 0.93) | 0.78 (-0.85, 2.41) | -1.01 (-3.06, 1.04) | 0.94 |  |
| Moderate | Reference | -2.02 (-4.10, 0.06) | -1.42 (-3.38, 0.54) | -0.64 (-2.95, 1.67) | -1.89 (-3.66, -0.12) | 0.25 |  |
| High | Reference | -0.40 (-1.58, 0.78) | -0.46 (-1.73, 0.80) | 0.73 (-0.77, 2.23) | -0.31 (-1.68, 1.06) | 0.70 |  |
| **Diabetes** |  |  |  |  |  |  | 0.884 |
| No | Reference | -0.95 (-1.69, -0.21) | -1.06 (-1.70, -0.42) | -0.09 (-0.98, 0.79) | -0.84 (-1.69, 0.01) | 0.40 |  |
| Yes | Reference | 0.11 (-2.73, 2.95) | -0.35 (-3.66, 2.95) | 2.62 (-0.45, 5.68) | 0.54 (-1.70, 2.78) | 0.26 |  |
| **Chronic Kidney Disease** |  |  |  |  |  |  | 0.688 |
| No | Reference | -0.83 (-1.50, -0.16) | -1.08 (-1.87, -0.28) | 0.08 (-0.77, 0.92) | -0.89 (-1.61, -0.17) | 0.32 |  |
| Yes | Reference | -1.03 (-3.55, 1.49) | -0.09 (-3.20, 3.03) | 0.77 (-3.39, 4.93) | 0.83 (-2.85, 4.50) | 0.43 |  |
| **Hypertension** |  |  |  |  |  |  | 0.876 |
| No | Reference | -0.80 (-1.65, 0.05) | -0.96 (-1.89, -0.03) | 0.02 (-1.00, 1.04) | -0.68 (-1.73, 0.38) | 0.70 |  |
| Yes | Reference | -1.20 (-2.66, 0.26) | -1.07 (-2.52, 0.38) | 0.29 (-1.19, 1.76) | -0.81 (-1.89, 0.26) | 0.70 |  |

The model was adjusted for all variables except the variables themselves.

Abbreviation: CI, confidence interval

Supplementary Table 2

The association between flavanones intake and PhenoAgeAccel in different subgroups.

| **Characteristic** | **Flavanones (mg/day)**  **β (95% CI)** | | | | | ***P* for trend** | ***P* for interaction** |
| --- | --- | --- | --- | --- | --- | --- | --- |
| **Q 1** | **Q 2** | **Q 3** | **Q 4** | **Q 5** |  |  |
| **Drink** |  |  |  |  |  |  | 0.496 |
| No | Reference | -0.20 (-1.56, 1.17) | -1.61 (-2.89, -0.33) | -1.69 (-2.85, -0.52) | -0.85 (-2.10, 0.41) | 0.01 |  |
| Yes | Reference | -0.05 (-1.06, 0.95) | -0.45 (-1.62, 0.72) | -0.45 (-1.55, 0.65) | -0.38 (-1.60, 0.84) | 0.37 |  |
| **Smoke** |  |  |  |  |  |  | 0.309 |
| No | Reference | -0.43 (-1.89, 1.03) | -1.82 (-3.13, -0.52) | -1.93 (-3.40, -0.46) | -1.42 (-2.81, -0.04) | 0.005 |  |
| Yes | Reference | 0.26 (-0.54, 1.07) | -0.35 (-1.29, 0.58) | -0.12 (-1.16, 0.93) | 0.52 (-0.55, 1.59) | 0.71 |  |
| **Body mass index** |  |  |  |  |  |  | **0.044** |
| <25 | Reference | 1.01 (-0.45, 2.48) | -1.62 (-3.12, -0.12) | -0.94 (-2.38, 0.50) | -0.01 (-1.29, 1.27) | 0.14 |  |
| 25-30 | Reference | -0.98 (-2.10, 0.15) | -0.22 (-1.32, 0.87) | -1.28 (-2.36, -0.21) | -1.39 (-2.66, -0.12) | 0.04 |  |
| >30 | Reference | 0.02 (-1.13, 1.17) | -1.58 (-2.73, -0.44) | -1.19 (-2.62, 0.25) | -0.04 (-1.36, 1.29) | 0.27 |  |
| **Physical activity** |  |  |  |  |  |  | 0.054 |
| Inactive | Reference | 0.44 (-0.79, 1.67) | -1.14 (-2.34, 0.06) | -1.26 (-2.58, 0.06) | -0.39 (-1.53, 0.76) | 0.05 |  |
| Insufficient | Reference | 0.47 (-1.69, 2.63) | -1.28 (-3.01, 0.45) | -1.38 (-3.36, 0.61) | -1.97 (-3.76, -0.19) | 0.003 |  |
| Moderate | Reference | 1.19 (-1.14, 3.51) | 0.25 (-2.08, 2.58) | -0.34 (-2.77, 2.09) | 0.23 (-2.16, 2.62) | 0.63 |  |
| High | Reference | -1.67 (-3.24, -0.10) | -1.44 (-2.90, 0.03) | -1.18 (-2.53, 0.17) | -0.77 (-2.20, 0.66) | 0.57 |  |
| **Diabetes** |  |  |  |  |  |  | 0.923 |
| No | Reference | -0.07 (-0.92, 0.77) | -1.02 (-1.74, -0.30) | -1.22 (-1.95, -0.50) | -0.54 (-1.44, 0.37) | 0.02 |  |
| Yes | Reference | -0.36 (-4.29, 3.57) | -1.87 (-4.80, 1.07) | -0.65 (-4.01, 2.71) | -1.02 (-4.49, 2.45) | 0.45 |  |
| **Chronic Kidney Diseas** |  |  |  |  |  |  | **0.047** |
| No | Reference | -0.17 (-0.94, 0.59) | -0.84 (-1.55, -0.13) | -1.06 (-1.91, -0.22) | -0.61 (-1.51, 0.29) | 0.04 |  |
| Yes | Reference | 1.49 (-2.78, 5.77) | -3.70 (-6.95, -0.44) | -2.48 (-6.71, 1.75) | -0.49 (-4.12, 3.14) | 0.26 |  |
| **Hypertension** |  |  |  |  |  |  | 0.595 |
| No | Reference | -0.31 (-1.06, 0.44) | -1.37 (-2.12, -0.62) | -1.43 (-2.17, -0.68) | -0.46 (-1.48, 0.55) | 0.03 |  |
| Yes | Reference | 0.39 (-1.19, 1.98) | -0.78 (-2.16, 0.60) | -0.75 (-2.51, 1.02) | -0.86 (-2.43, 0.71) | 0.14 |  |

The model was adjusted for all variables except the variables themselves.

Abbreviation: CI, confidence interval

Supplementary Table 3

The association between flavones intake and PhenoAgeAccel in different subgroups.

| **Characteristic** | **Flavones (mg/day)**  **β (95% CI)** | | | | | ***P* for trend** | ***P* for interaction** |
| --- | --- | --- | --- | --- | --- | --- | --- |
| **Q 1** | **Q 2** | **Q 3** | **Q 4** | **Q 5** |  |  |
| **Drink** |  |  |  |  |  |  | 0.76 |
| No | Reference | -0.88 (-2.05, 0.29) | -2.11 (-3.28, -0.94) | -1.95 (-3.32, -0.57) | -1.98 (-3.24, -0.72) | 0.002 |  |
| Yes | Reference | -0.50 (-1.62, 0.61) | -1.04 (-2.17, 0.08) | -1.60 (-2.69, -0.52) | -1.00 (-2.12, 0.12) | 0.02 |  |
| **Smoke** |  |  |  |  |  |  | 0.927 |
| No | Reference | -0.69 (-1.78, 0.40) | -1.86 (-2.92, -0.81) | -2.04 (-3.31, -0.77) | -1.88 (-3.16, -0.60) | 0.002 |  |
| Yes | Reference | -0.63 (-1.87, 0.61) | -1.49 (-2.66, -0.31) | -1.53 (-2.85, -0.21) | -1.00 (-2.19, 0.18) | 0.03 |  |
| **Body mass index** |  |  |  |  |  |  | 0.624 |
| <25 | Reference | -1.48 (-3.19, 0.23) | -2.16 (-3.96, -0.36) | -3.14 (-4.72, -1.55) | -2.25 (-4.11, -0.39) | 0.003 |  |
| 25-30 | Reference | -0.03 (-1.41, 1.34) | -1.04 (-2.31, 0.22) | -1.16 (-2.42, 0.11) | -0.99 (-2.26, 0.29) | 0.04 |  |
| >30 | Reference | -0.73 (-1.84, 0.37) | -1.96 (-3.34, -0.57) | -1.23 (-2.75, 0.28) | -1.59 (-2.82, -0.36) | 0.02 |  |
| **Physical activity** |  |  |  |  |  |  | 0.163 |
| Inactive | Reference | 0.21 (-1.08, 1.51) | -1.15 (-2.23, -0.08) | -0.71 (-1.73, 0.31) | -1.15 (-2.39, 0.10) | 0.02 |  |
| Insufficient | Reference | -0.61 (-2.53, 1.31) | -2.17 (-4.12, -0.23) | -2.72 (-4.82, -0.62) | -3.13 (-5.24, -1.01) | 0.001 |  |
| Moderate | Reference | -2.48 (-4.61, -0.35) | -2.65 (-5.30, 0.01) | -3.68 (-6.13, -1.22) | -1.40 (-3.57, 0.77) | 0.3 |  |
| High | Reference | -1.52 (-3.00, -0.04) | -1.96 (-3.59, -0.34) | -2.20 (-3.82, -0.59) | -1.96 (-3.65, -0.26) | 0.04 |  |
| **Diabetes** |  |  |  |  |  |  | 0.691 |
| No | Reference | -0.85 (-1.68, -0.02) | -1.70 (-2.46, -0.94) | -1.93 (-2.90, -0.96) | -1.67 (-2.53, -0.81) | <0.001 |  |
| Yes | Reference | 0.64 (-2.95, 4.22) | -1.21 (-4.38, 1.96) | -0.18 (-3.13, 2.78) | -0.31 (-3.93, 3.31) | 0.72 |  |
| **Chronic Kidney Diseas** |  |  |  |  |  |  | **0.012** |
| No | Reference | -1.11 (-1.97, -0.25) | -1.83 (-2.64, -1.02) | -1.97 (-2.97, -0.97) | -1.53 (-2.47, -0.58) | 0.001 |  |
| Yes | Reference | 1.75 (-1.42, 4.92) | -1.28 (-4.62, 2.06) | -0.10 (-3.16, 2.96) | -2.29 (-5.11, 0.54) | 0.07 |  |
| **Hypertension** |  |  |  |  |  |  | 0.889 |
| No | Reference | -1.07 (-1.90, -0.24) | -1.87 (-2.73, -1.01) | -1.97 (-2.92, -1.01) | -1.82 (-2.72, -0.92) | <0.001 |  |
| Yes | Reference | -0.15 (-2.05, 1.76) | -1.33 (-2.91, 0.26) | -1.47 (-3.24, 0.31) | -1.24 (-3.12, 0.63) | 0.04 |  |

The model was adjusted for all variables except the variables themselves.

Abbreviation: CI, confidence interval

Supplementary Table 4

The association between flavonols intake and PhenoAgeAccel in different subgroups.

| **Characteristic** | **Flavonols (mg/day)**  **β (95% CI)** | | | | | ***P* for trend** | ***P* for interaction** |
| --- | --- | --- | --- | --- | --- | --- | --- |
| **Q 1** | **Q 2** | **Q 3** | **Q 4** | **Q 5** |  |  |
| **Drink** |  |  |  |  |  |  | 0.112 |
| No | Reference | -0.31 (-1.50, 0.89) | -1.33 (-2.42, -0.24) | -1.61 (-2.67, -0.55) | -1.07 (-2.18, 0.04) | 0.02 |  |
| Yes | Reference | -0.73 (-1.90, 0.44) | -0.26 (-1.30, 0.79) | -0.42 (-1.65, 0.81) | -0.57 (-1.97, 0.83) | 0.58 |  |
| **Smoke** |  |  |  |  |  |  | 0.234 |
| No | Reference | -1.17 (-2.48, 0.15) | -1.72 (-3.13, -0.30) | -1.95 (-3.08, -0.82) | -1.55 (-2.77, -0.33) | 0.02 |  |
| Yes | Reference | 0.29 (-0.84, 1.42) | 0.11 (-1.00, 1.22) | -0.25 (-1.28, 0.78) | -0.19 (-1.45, 1.07) | 0.51 |  |
| **Body mass index** |  |  |  |  |  |  | 0.413 |
| <25 | Reference | -0.61 (-2.25, 1.03) | -0.77 (-2.09, 0.56) | -1.11 (-2.65, 0.42) | -1.34 (-2.78, 0.10) | 0.08 |  |
| 25-30 | Reference | 0.10 (-0.93, 1.13) | -0.23 (-1.41, 0.96) | -0.81 (-1.84, 0.22) | 0.03 (-1.00, 1.05) | 0.54 |  |
| >30 | Reference | -0.78 (-2.34, 0.78) | -1.47 (-2.74, -0.20) | -1.59 (-2.76, -0.42) | -1.14 (-2.75, 0.48) | 0.1 |  |
| **Physical activity** |  |  |  |  |  |  | 0.49 |
| Inactive | Reference | -0.65 (-2.10, 0.79) | -0.90 (-2.28, 0.49) | -1.31 (-2.67, 0.04) | -0.41 (-1.98, 1.17) | 0.42 |  |
| Insufficient | Reference | -0.30 (-2.54, 1.95) | -1.64 (-3.30, 0.02) | -1.31 (-3.46, 0.84) | -1.77 (-3.65, 0.12) | 0.04 |  |
| Moderate | Reference | -0.48 (-2.55, 1.59) | -0.90 (-3.35, 1.55) | -0.94 (-2.76, 0.88) | -1.35 (-3.63, 0.93) | 0.2 |  |
| High | Reference | -0.27 (-1.62, 1.09) | -0.43 (-1.46, 0.60) | -1.08 (-2.13, -0.03) | -0.73 (-1.82, 0.35) | 0.14 |  |
| **Diabetes** |  |  |  |  |  |  | 0.203 |
| No | Reference | -0.55 (-1.41, 0.31) | -0.84 (-1.69, 0.02) | -0.86 (-1.69, -0.02) | -0.76 (-1.70, 0.19) | 0.11 |  |
| Yes | Reference | -0.53 (-3.74, 2.68) | -1.39 (-3.86, 1.08) | -4.20 (-6.97, -1.43) | -1.20 (-3.64, 1.24) | 0.07 |  |
| **Chronic Kidney Diseas** |  |  |  |  |  |  | 0.553 |
| No | Reference | -0.30 (-1.17, 0.57) | -0.81 (-1.56, -0.06) | -1.06 (-1.85, -0.26) | -0.65 (-1.57, 0.27) | 0.09 |  |
| Yes | Reference | -1.74 (-5.43, 1.95) | -0.98 (-3.99, 2.03) | -2.53 (-6.14, 1.08) | -3.07 (-7.18, 1.04) | 0.14 |  |
| **Hypertension** |  |  |  |  |  |  | 0.247 |
| No | Reference | -1.02 (-2.17, 0.14) | -1.44 (-2.28, -0.60) | -1.59 (-2.52, -0.66) | -1.01 (-2.07, 0.04) | 0.06 |  |
| Yes | Reference | 0.63 (-1.25, 2.50) | 0.22 (-1.23, 1.67) | -0.41 (-1.80, 0.97) | -0.67 (-1.99, 0.65) | 0.14 |  |

The model was adjusted for all variables except the variables themselves.

Abbreviation: CI, confidence interval

Supplementary Table 5

The association between total flavonoid intake and PhenoAgeAccel in different subgroups.

| **Characteristic** | **Flavonols (mg/day)**  **β (95% CI)** | | | | | ***P* for trend** | ***P* for interaction** |
| --- | --- | --- | --- | --- | --- | --- | --- |
| **Q 1** | **Q 2** | **Q 3** | **Q 4** | **Q 5** |  |  |
| **Drink** |  |  |  |  |  |  | 0.616 |
| No | Reference | -0.90 (-2.08, 0.27) | -0.64 (-1.74, 0.45) | 0.19 (-1.10, 1.48) | -0.97 (-2.12, 0.19) | 0.46 |  |
| Yes | Reference | -0.47 (-2.14, 1.19) | -0.97 (-2.08, 0.13) | -0.27 (-1.59, 1.06) | -0.25 (-1.89, 1.39) | 0.87 |  |
| **Smoke** |  |  |  |  |  |  | 0.604 |
| No | Reference | -1.32 (-2.36, -0.27) | -1.29 (-2.29, -0.28) | -0.37 (-1.37, 0.63) | -1.44 (-2.49, -0.40) | 0.13 |  |
| Yes | Reference | -0.28 (-1.87, 1.30) | -0.26 (-1.35, 0.83) | 0.13 (-1.15, 1.41) | 0.06 (-1.38, 1.49) | 0.76 |  |
| **Body mass index** |  |  |  |  |  |  | 0.413 |
| <25 | Reference | -0.57 (-2.17, 1.03) | -1.42 (-2.85, 0.02) | -0.18 (-1.46, 1.09) | -0.92 (-2.38, 0.54) | 0.44 |  |
| 25-30 | Reference | -0.35 (-1.73, 1.02) | -0.49 (-1.69, 0.70) | -0.44 (-1.91, 1.04) | -0.17 (-1.35, 1.01) | 0.84 |  |
| >30 | Reference | -1.17 (-2.10, -0.25) | -0.59 (-1.56, 0.38) | 0.50 (-1.23, 2.22) | -1.03 (-2.19, 0.14) | 0.53 |  |
| **Physical activity** |  |  |  |  |  |  | 0.31 |
| Inactive | Reference | -0.07 (-1.44, 1.31) | -0.73 (-1.94, 0.48) | -0.06 (-1.97, 1.86) | -0.59 (-1.81, 0.63) | 0.43 |  |
| Insufficient | Reference | -1.99 (-4.00, 0.01) | -1.41 (-3.23, 0.40) | -0.17 (-2.24, 1.90) | -1.52 (-3.66, 0.61) | 0.53 |  |
| Moderate | Reference | -1.28 (-3.83, 1.27) | -1.97 (-3.79, -0.15) | -2.73 (-4.64, -0.82) | -1.86 (-3.85, 0.12) | 0.06 |  |
| High | Reference | -0.91 (-2.18, 0.36) | -0.24 (-1.28, 0.81) | 0.85 (-0.34, 2.05) | -0.38 (-1.73, 0.98) | 0.36 |  |
| **Diabetes** |  |  |  |  |  |  | 0.543 |
| No | Reference | -1.12 (-1.89, -0.35) | -0.93 (-1.69, -0.18) | -0.35 (-1.14, 0.44) | -0.86 (-1.71, -0.01) | 0.33 |  |
| Yes | Reference | 1.09 (-1.84, 4.01) | -1.07 (-3.41, 1.28) | 2.82 (-0.74, 6.38) | 0.61 (-1.75, 2.96) | 0.35 |  |
| **Chronic Kidney Diseas** |  |  |  |  |  |  | 0.653 |
| No | Reference | -0.73 (-1.38, -0.07) | -0.82 (-1.51, -0.13) | -0.30 (-1.11, 0.52) | -0.79 (-1.61, 0.03) | 0.24 |  |
| Yes | Reference | -1.39 (-5.23, 2.45) | -0.97 (-4.11, 2.17) | 2.75 (-1.73, 7.22) | -0.04 (-3.89, 3.81) | 0.41 |  |
| **Hypertension** |  |  |  |  |  |  | 0.283 |
| No | Reference | -1.00 (-1.82, -0.18) | -0.56 (-1.39, 0.26) | -0.30 (-1.24, 0.65) | -0.56 (-1.62, 0.50) | 0.75 |  |
| Yes | Reference | -0.23 (-1.68, 1.22) | -1.44 (-2.78, -0.10) | 0.59 (-0.94, 2.11) | -0.80 (-1.96, 0.36) | 0.36 |  |

The model was adjusted for all variables except the variables themselves.

Abbreviation: CI, confidence interval
